# Supplementary material for: CircAnks1a in the spinal cord regulates hypersensitivity in a rodent model of neuropathic pain
Source: PubMed Central journal article supplement (PMC6739334; doi:10.1038/s41467-019-12049-0), 2019-09-11
Supplement: 41467_2019_12049_MOESM1_ESM.pdf [file 41467_2019_12049_MOESM1_ESM.pdf]

## Supplementary Information

### **CircAnks1a in the spinal cord regulates hypersensitivity in a rodent model of neuropathic pain**

Su-Bo Zhang<sup>1,2, a</sup>, Su-Yan Lin<sup>2, 3, a</sup>, Meng Liu<sup>2, 3, a</sup>, Cui-Cui Liu<sup>1, a</sup>, Huan-Huan Ding<sup>2, 3</sup>, Yang Sun<sup>4</sup>, Chao Ma<sup>1, \*</sup>, Rui-Xian Guo<sup>2</sup>, You-You Lv<sup>3</sup>, Shao-Ling Wu<sup>1</sup>, Ting Xu<sup>2, \*</sup>, Wen-Jun Xin<sup>2, 3, 5, \*</sup>

<sup>1</sup>Guangdong Provincial Key Laboratory of Malignant Tumor Epigenetics and Gene Regulation, Department of Rehabilitation Medicine, Sun Yat-Sen Memorial Hospital, Sun Yat-Sen University, Guangzhou, 510120, China

<sup>2</sup>Guangdong Province Key Laboratory of Brain Function and Disease, Department of Physiology, Zhongshan School of Medicine, Sun Yat-Sen University, Guangzhou, 510080, China

<sup>3</sup>Neuroscience Program, Zhongshan School of Medicine, the Fifth Affiliated Hospital of Sun Yat-Sen University, Sun Yat-Sen University, China

<sup>4</sup>Department of Rehabilitation Medicine, the Second Affiliated Hospital of Xi'an Medical University, Xi'an, 710038, China

<sup>5</sup>Center for Brain Science and Brain-Inspired Intelligence, Guangdong-Hong Kong-Macao Greater Bay Area

<sup>a</sup> These authors contributed equally to this work

\* Joint corresponding author

# Supplementary Figure 1

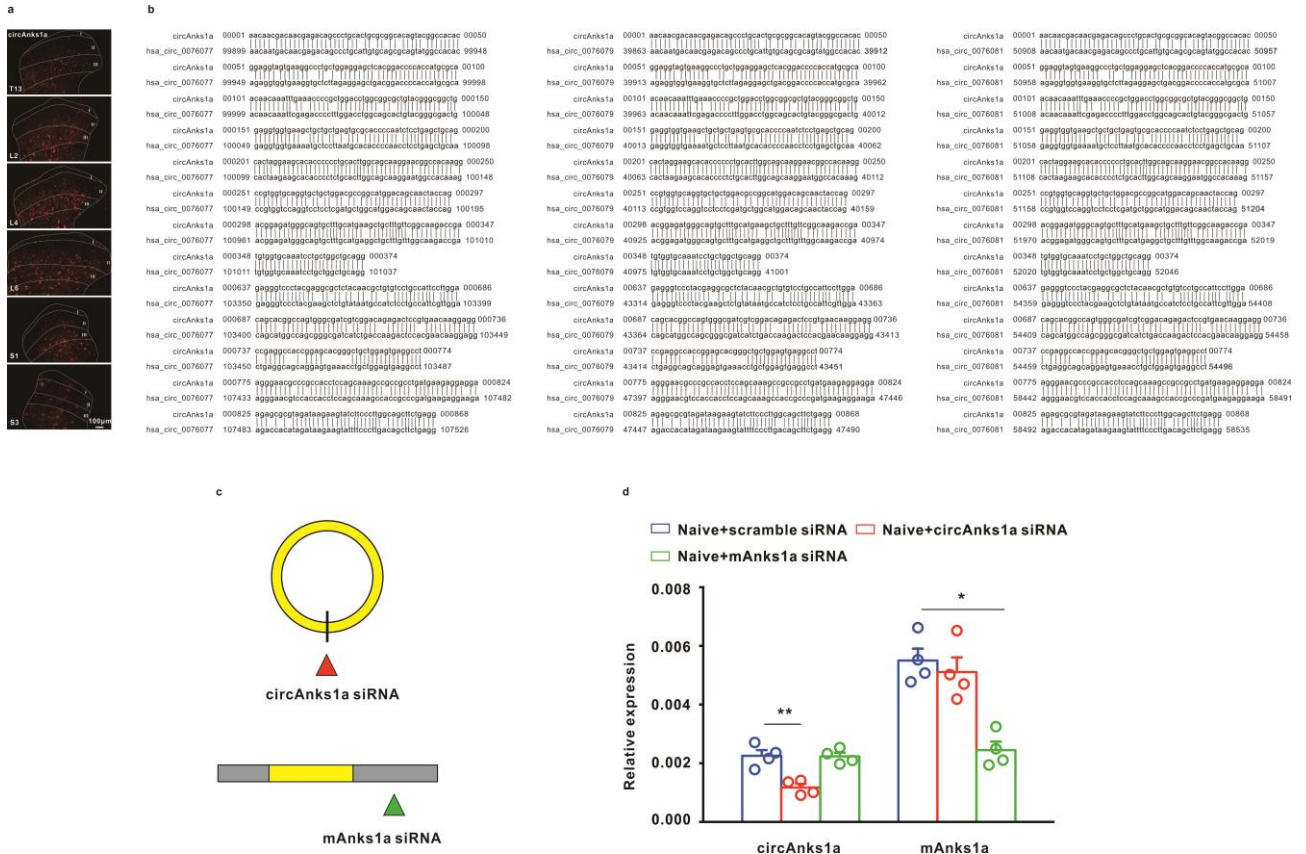

Supplementary Figure 1 (a) Expression of circAnks1a in different level of spinal from T13 to S3. (b) Full-length sequence of circAnks1a was blast with hsa\_circ\_0076077, hsa\_circ\_0076079 and hsa\_circ\_0076081. (c) The diagram of designed siRNA. (d) Application of circAnks1a siRNA, but not mAnks1a siRNA, significantly decreased the expression of circAnks1a in naive animals. (n=4 in each group, \* $P<0.05$ , \*\* $P<0.01$  vs the correspondence naive group, two-tailed one-way ANOVA). Data are presented as mean  $\pm$  s.e.m.

## Supplementary Figure 2

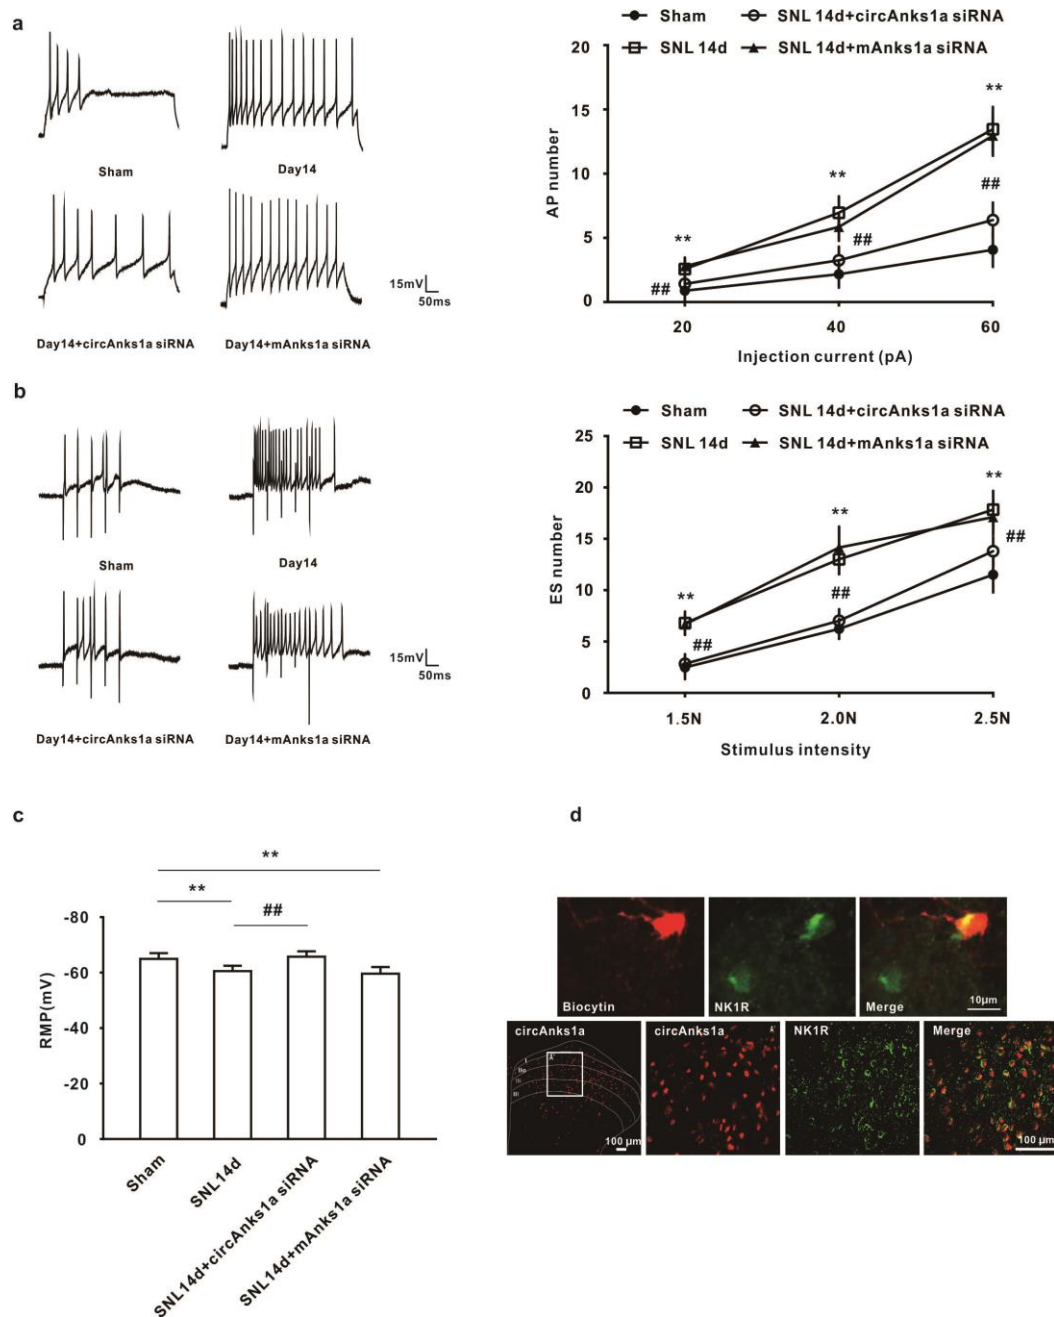

Supplementary Figure 2 The number of depolarizing current injection-induced action potentials (a), and EPSP-spike coupling (b) were increased in dorsal horn neuron at day 14 following SNL, which were alleviated by intrathecal injection of circAnks1a siRNA, but not that of mAnks1a siRNA ( $n = 28$  for a and 25 for b,  $**P < 0.01$  vs the correspondence sham group,  $##P < 0.01$  vs the SNL group, two-tailed permutation tests). (c) The positive shift of resting membrane potential were also reversed by the circAnks1a siRNA ( $n=28$ ,  $**P < 0.01$  vs the correspondence sham group,  $##P < 0.01$  vs the SNL group, two-tailed one-way ANOVA). (d) The electrophysiology studies were performed on NK1R-positive neurons in the spinal cord slices and circAnks1a was colocalized with the NK1R-positive cells. Data are presented as mean  $\pm$  s.e.m.

### Supplementary Figure 3

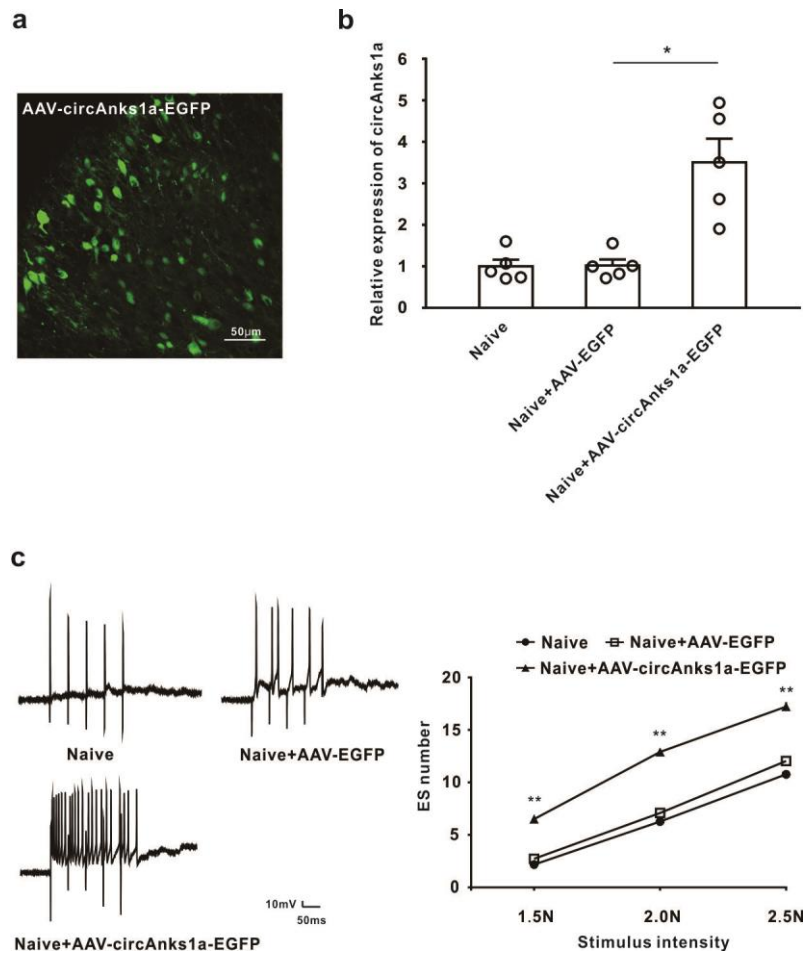

Supplementary Figure 3 Green Fluorescences (a) and increased circAnks1a level (b) in dorsal horn suggested a high transfection of AAV-circAnks1a-EGFP ( $n=5$ ,  $*P < 0.05$  vs the correspondence AAV-EGFP group, two-tailed one-way ANOVA). (c) Intraspinal injection of the recombinant AAV-circAnks1a-EGFP increased the number of EPSP-spike coupling ( $n = 22$ ,  $**P < 0.01$  vs the correspondence AAV-EGFP group, two-tailed permutation tests). Data are presented as mean  $\pm$  s.e.m.

## Supplementary Figure 4

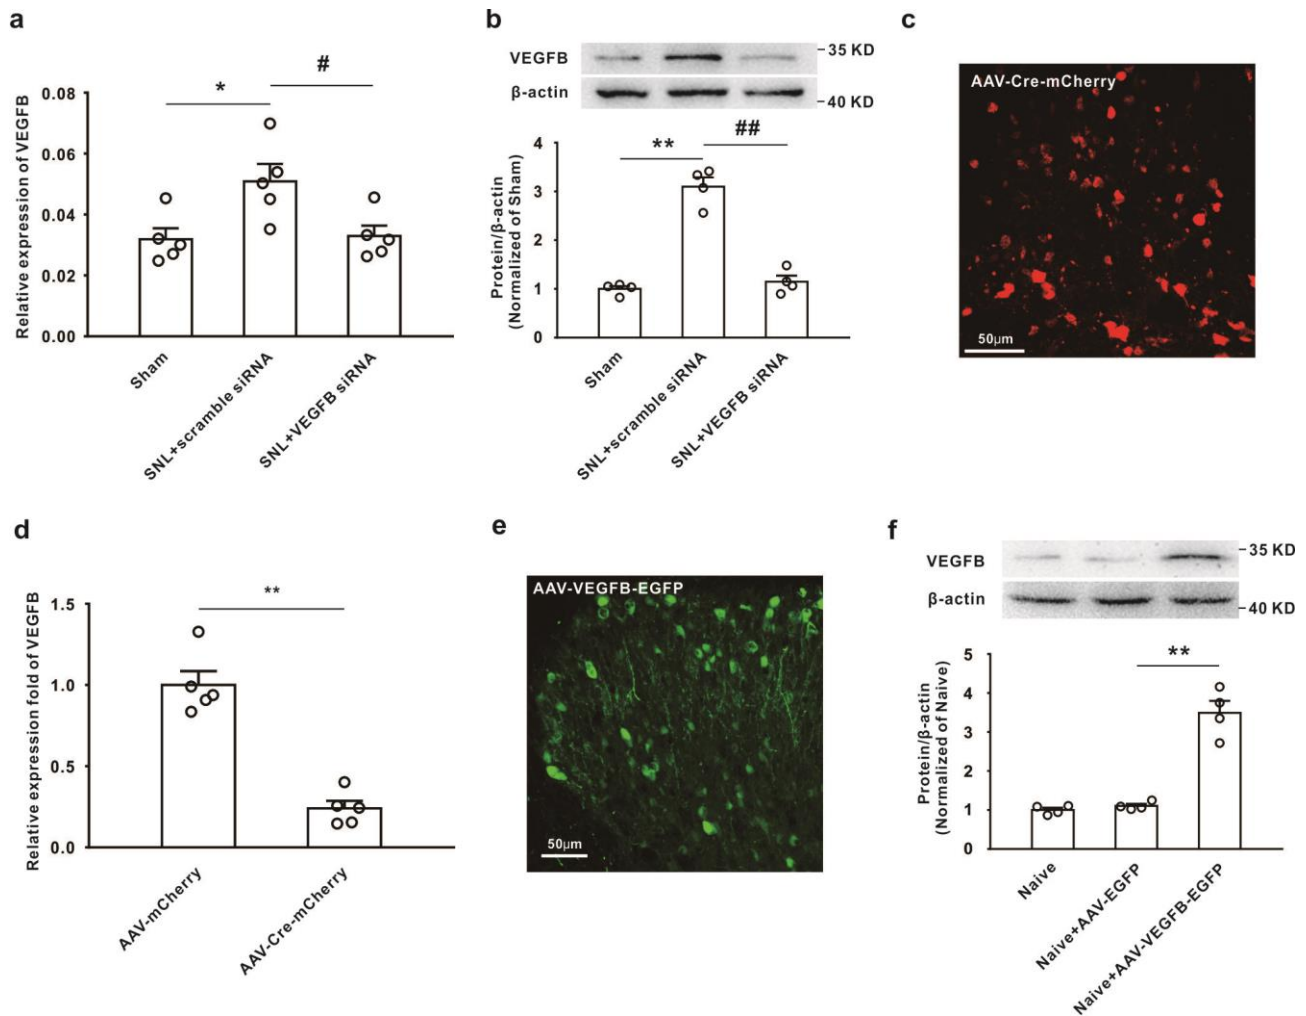

Supplementary Figure 4 Intrathecal injection of VEGFB siRNA significantly decreased the VEGFB mRNA (a) and protein (b) expression (\* $P < 0.05$ , \*\* $P < 0.01$  vs the sham group, # $P < 0.05$ , ## $P < 0.01$  vs the scramble group,  $n=5$  for a and  $n=4$  for b, two-tailed one-way ANOVA). Twenty-one days after injection of AAV-Cre-mCherry, a marked red fluorescence (c) and decreased expression of VEGFB mRNA (d) were observed (\*\* $P < 0.01$  vs the AAV-mCherry group,  $n=3$  for c and  $n=5$  for d, two-tailed two-sample  $t$ -tests). A marked green fluorescence (e) and increased VEGFB protein (f) levels were observed 21 days after injection of AAV-VEGFB-EGFP (\*\* $P < 0.01$  vs the AAV-EGFP group,  $n=3$  for e and  $n=4$  for f, two-tailed one-way ANOVA). Data are presented as mean  $\pm$  s.e.m.

## Supplementary Figure 5

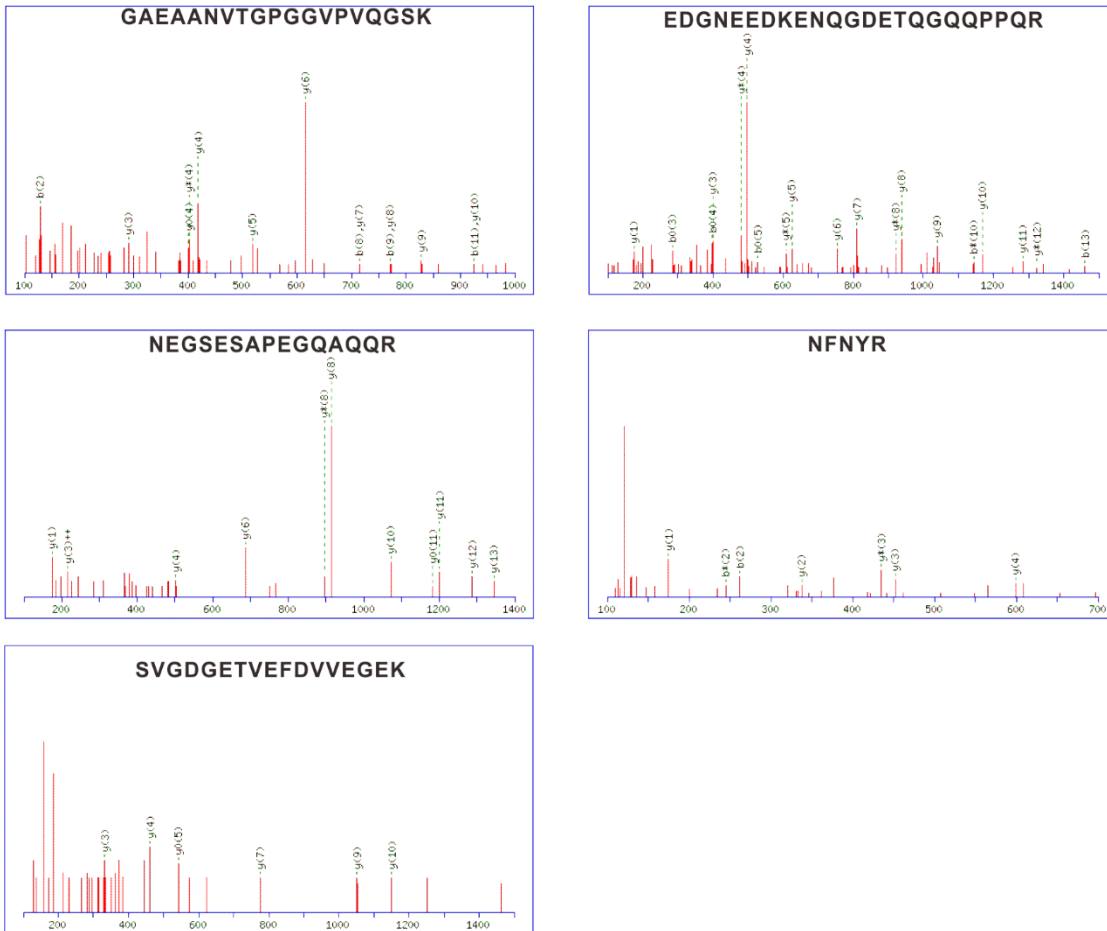

Supplementary Figure 5 The proteins pulled down by linearized circAnks1a were subjected to liquid chromatography-mass spectrometry analysis, by which five peptide sequences of YBX1 were identified.

## Supplementary Figure 6

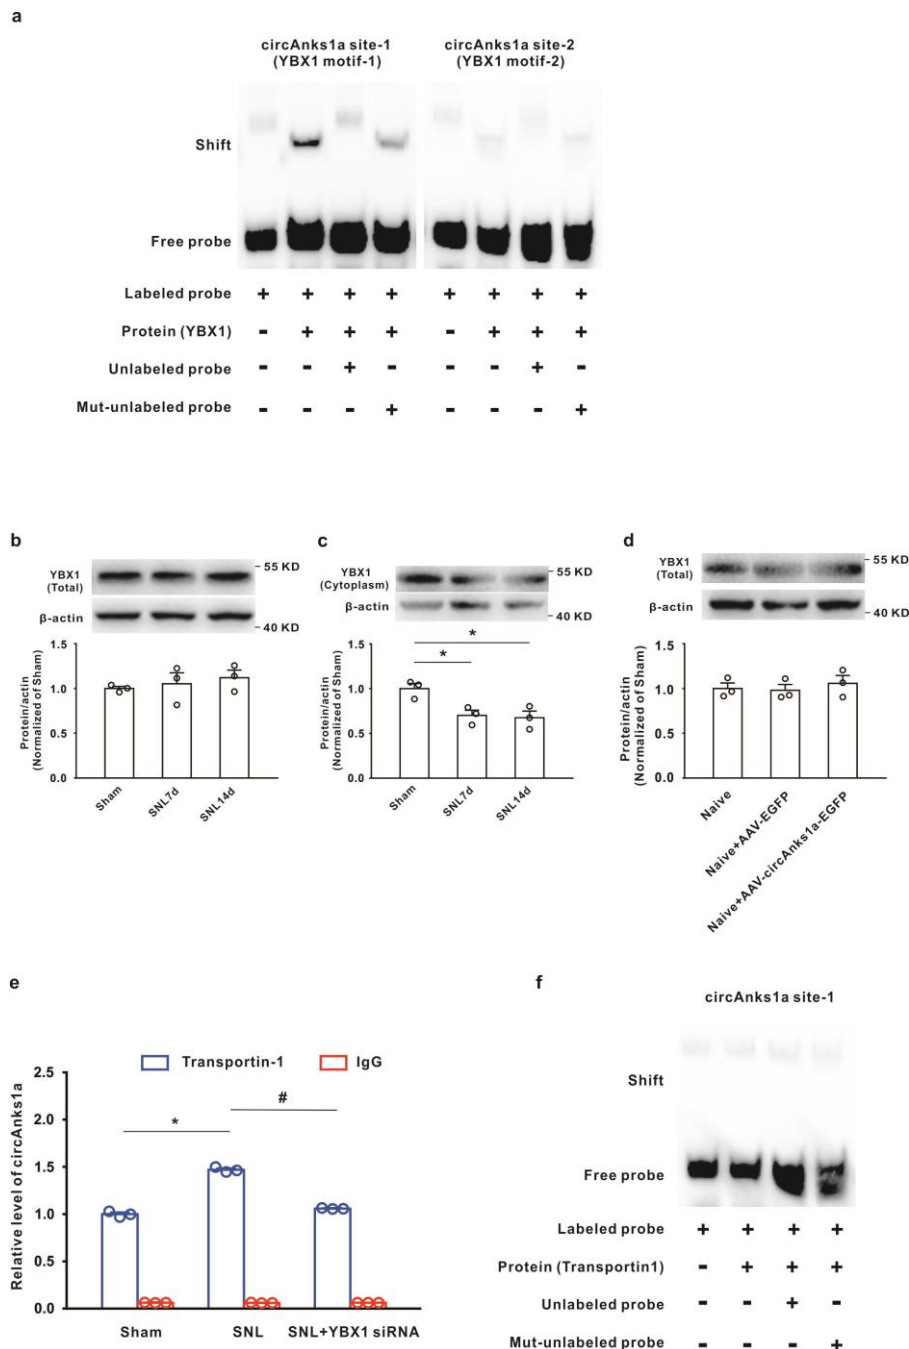

Supplementary Figure 6 (a) The EMSA experiment showed that recombinant YBX1 protein can obviously bind to the circAnks1a site-1 (YBX1 motif-1), but not site-2 (YBX1 motif-2). SNL did not affect the total amount of YBX1 (b), but decreased the cytoplasmic YBX1 level (c) ( $*P < 0.05$  vs the sham group,  $n=3$ , two-tailed one-way ANOVA). (d) CircAnks1a has no effect on YBX1 expression ( $n=3$ ). (e) SNL significantly increased the level of circAnks1a immunoprecipitated by transporting-1 antibody by using RIP methods, which was suppressed by YBX1 siRNA ( $*P < 0.05$  vs the sham group,  $\#P < 0.05$  vs the SNL group,  $n=3$ , two-tailed one-way ANOVA). (f) Further EMSA showed that recombinant transportin-1 protein cannot bind to the circAnks1a site 1. Data are presented as mean  $\pm$  s.e.m.

## Supplementary Figure 7

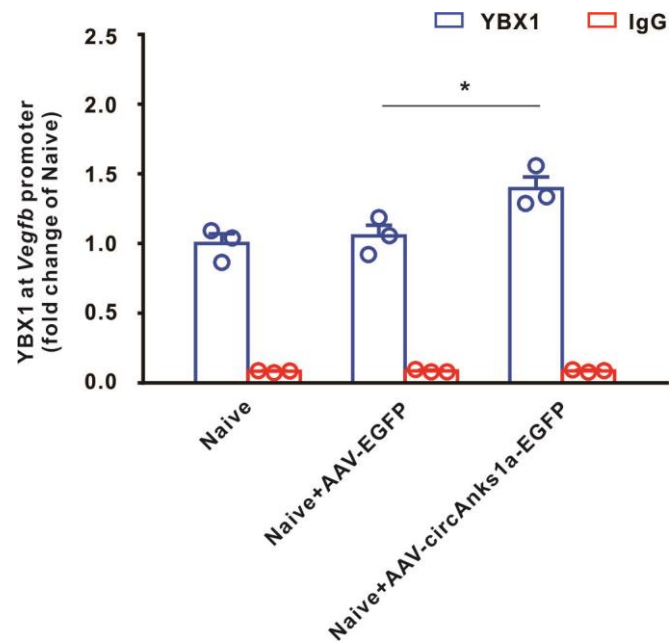

Supplementary Figure 7 The recruitment of YBX1 on the *Vegfb* promoter was significantly increased in naive on day 21 following injection of AAV2/9-circAnks1a-EGFP. (\* $P < 0.05$  vs the AAV-EGFP group,  $n=3$ , two-tailed one-way ANOVA). Data are presented as mean  $\pm$  s.e.m.



**Supplementary Table 1****Summary of RNA-seq datasets from the tissue of different time points (Day 7 and Day 14) and sham (Day 14)**

| Sample                   | Sham(Day14) | SNL(Day7)  | SNL(Day14) |
|--------------------------|-------------|------------|------------|
| Effective clean reads    | 75,025,228  | 93,808,070 | 80,212,334 |
| Mapped reads(unfusion)   | 65,896,226  | 78,607,412 | 68,742,172 |
| Unmapped reads(unfusion) | 9,129,002   | 15,200,658 | 11,470,162 |
| Mapped reads(fusion)     | 4,224,319   | 6,183,831  | 4,855,195  |
| Total mapped reads       | 70,120,545  | 84,791,243 | 73,597,367 |

## Supplementary Table 2

### Length analysis of circRNAs

| Item   | circRNA | Min.length | Max.length | Median length |
|--------|---------|------------|------------|---------------|
| Number | 12849   | 57         | 99915      | 738           |

**Supplementary Table 3****Relative expression of 21 circRNAs**

| Name                               | Relative expression of circRNAs |             |              |
|------------------------------------|---------------------------------|-------------|--------------|
|                                    | Sham (n=4)                      | Day 7 (n=4) | Day 14 (n=4) |
| rat_circ:chr10:4140144-4172981     | 1.00±0.13                       | 0.81±0.05   | 0.94±0.08    |
| rat_circ:chr3:8747385-8750638      | 1.00±0.12                       | 0.69±0.12   | 0.79±0.06    |
| rat_circ:chr1:16514097-16530121    | 1.00±0.09                       | 0.75±0.10   | 0.99±0.11    |
| rat_circ:chr10:11669353-11670969   | 1.00±0.08                       | 0.72±0.12   | 0.74±0.04    |
| rat_circ:chr2:172320327-172320627  | 1.00±0.10                       | 0.99±0.06   | 1.41±0.07    |
| rat_circ:chr9:100507197-100507524  | 1.00±0.04                       | 0.85±0.08   | 0.87±0.07    |
| rat_circ:chr1:250833012-250919167  | 1.00±0.10                       | 0.95±0.06   | 1.06±0.05    |
| rat_circ:chr14:81667646-81672500   | 1.00±0.13                       | 0.91±0.18   | 0.85±0.09    |
| rat_circ:chr20:7561057-7573740     | 1.00±0.10                       | 1.65±0.15   | 2.22±0.17    |
| rat_circ:chr6:23270238-23279721    | 1.00±0.10                       | 0.82±0.13   | 0.85±0.08    |
| rat_circ:chr17:23684383-23701761   | 1.00±0.08                       | 1.21±0.21   | 1.08±0.02    |
| rat_circ:chr8:93948882-94008016    | 1.00±0.04                       | 1.34±0.14   | 1.38±0.18    |
| rat_circ:chr12:19311511-19312478   | 1.00±0.07                       | 0.90±0.05   | 1.01±0.10    |
| rat_circ:chr10:109122252-109148654 | 1.00±0.14                       | 0.82±0.09   | 0.84±0.09    |
| rat_circ:chr2:188886906-188931941  | 1.00±0.03                       | 0.93±0.06   | 1.06±0.10    |
| rat_circ:chr18:27956412-27984766   | 1.00±0.08                       | 0.94±0.10   | 1.11±0.09    |
| rat_circ:chr4:84682374-84706882    | 1.00±0.13                       | 0.83±0.16   | 0.80±0.07    |
| rat_circ:chr3:122130941-122141403  | 1.00±0.03                       | 0.98±0.10   | 1.13±0.18    |
| rat_circ:chr2:172312783-172350004  | 1.00±0.17                       | 0.68±0.08   | 0.99±0.08    |
| rat_circ:chr1:79848478-79856028    | 1.00±0.11                       | 0.72±0.05   | 0.88±0.16    |
| rat_circ:chr7:11216020-11216322    | 1.00±0.13                       | 1.07±0.09   | 1.37±0.18    |

**Supplementary Table 4**

| <b>circName</b> | <b>miRNA</b>     | <b>Total Score</b> | <b>Total Energy</b> | <b>Positions</b> |
|-----------------|------------------|--------------------|---------------------|------------------|
| circAnks1a      | rno-miR-15b-5p   | 467                | -64.53              | 245 912 149      |
| circAnks1a      | rno-miR-322-5p   | 460                | -64.63              | 912 149 244      |
| circAnks1a      | rno-miR-16-5p    | 455                | -55.14              | 913 249 149      |
| circAnks1a      | rno-miR-494-5p   | 454                | -62.77              | 380 2 981        |
| circAnks1a      | rno-miR-497-5p   | 446                | -66.47              | 245 910 150      |
| circAnks1a      | rno-miR-324-3p   | 440                | -65.03              | 872 294 577      |
| circAnks1a      | rno-miR-15a-5p   | 440                | -47.62              | 912 252 152      |
| circAnks1a      | rno-miR-103-1-5p | 436                | -59.51              | 929 192 303      |
| circAnks1a      | rno-miR-195-5p   | 428                | -50.56              | 249 912 151      |
| circAnks1a      | rno-miR-770-5p   | 318                | -54.45              | 238 333          |
| circAnks1a      | rno-miR-1843b-5p | 313                | -46.77              | 501 764          |
| circAnks1a      | rno-miR-22-3p    | 311                | -42.33              | 831 214          |
| circAnks1a      | rno-miR-344b-5p  | 300                | -41.21              | 391 784          |
| circAnks1a      | rno-miR-320-5p   | 297                | -48.06              | 890 572          |
| circAnks1a      | rno-miR-330-3p   | 295                | -38.79              | 297 313          |
| circAnks1a      | rno-miR-152-3p   | 292                | -29.06              | 10 989           |
| circAnks1a      | rno-miR-761      | 292                | -42.42              | 52 346           |
| circAnks1a      | rno-miR-3548     | 292                | -40.66              | 295 874          |
| circAnks1a      | rno-miR-107-5p   | 288                | -34.29              | 929 192          |
| circAnks1a      | rno-miR-344g     | 288                | -48.35              | 390 849          |
| circAnks1a      | rno-miR-666-3p   | 286                | -40.63              | 180 148          |
| circAnks1a      | rno-miR-449c-5p  | 286                | -40.19              | 12 991           |
| circAnks1a      | rno-miR-148b-3p  | 280                | -24.88              | 9 988            |
| circAnks1a      | rno-miR-214-3p   | 280                | -31.33              | 53 347           |

|            |                  |     |        |        |
|------------|------------------|-----|--------|--------|
| circAnks1a | rno-miR-148a-3p  | 280 | -23.42 | 10 989 |
| circAnks1a | rno-miR-496-5p   | 168 | -22.5  | 382    |
| circAnks1a | rno-let-7b-5p    | 167 | -27.05 | 517    |
| circAnks1a | rno-let-7a-5p    | 163 | -21.52 | 517    |
| circAnks1a | rno-miR-410-5p   | 163 | -20.11 | 381    |
| circAnks1a | rno-miR-3558-3p  | 162 | -21.56 | 508    |
| circAnks1a | rno-miR-292-3p   | 160 | -33.08 | 116    |
| circAnks1a | rno-let-7c-5p    | 159 | -23.5  | 517    |
| circAnks1a | rno-miR-331-5p   | 156 | -20.22 | 501    |
| circAnks1a | rno-let-7i-5p    | 156 | -19.48 | 517    |
| circAnks1a | rno-miR-293-3p   | 156 | -22.43 | 19     |
| circAnks1a | rno-let-7d-5p    | 155 | -21.76 | 517    |
| circAnks1a | rno-miR-339-3p   | 155 | -27    | 636    |
| circAnks1a | rno-let-7e-5p    | 155 | -20.83 | 517    |
| circAnks1a | rno-miR-6334     | 155 | -36.49 | 843    |
| circAnks1a | rno-miR-3574     | 154 | -26.35 | 129    |
| circAnks1a | rno-miR-935      | 152 | -19.72 | 580    |
| circAnks1a | rno-miR-1843a-5p | 152 | -24.55 | 506    |
| circAnks1a | rno-miR-615      | 151 | -23.68 | 71     |
| circAnks1a | rno-miR-24-3p    | 149 | -18.77 | 584    |
| circAnks1a | rno-miR-92a-2-5p | 149 | -19.34 | 74     |
| circAnks1a | rno-miR-291a-5p  | 149 | -24.79 | 853    |
| circAnks1a | rno-miR-760-5p   | 149 | -19.17 | 838    |
| circAnks1a | rno-miR-486      | 149 | -25.1  | 124    |
| circAnks1a | rno-miR-3065-3p  | 148 | -20.9  | 242    |
| circAnks1a | rno-miR-103-3p   | 147 | -26.73 | 245    |

|            |                   |     |        |     |
|------------|-------------------|-----|--------|-----|
| circAnks1a | rno-miR-107-3p    | 147 | -24.61 | 245 |
| circAnks1a | rno-miR-351-3p    | 146 | -19.45 | 596 |
| circAnks1a | rno-miR-25-3p     | 146 | -20.91 | 339 |
| circAnks1a | rno-miR-500-5p    | 146 | -21.78 | 218 |
| circAnks1a | rno-miR-343       | 145 | -27.55 | 40  |
| circAnks1a | rno-miR-6331      | 145 | -30.7  | 726 |
| circAnks1a | rno-miR-15a-3p    | 145 | -24.72 | 27  |
| circAnks1a | rno-miR-193a-3p   | 144 | -18.76 | 680 |
| circAnks1a | rno-miR-204-3p    | 144 | -23.86 | 424 |
| circAnks1a | rno-miR-3571      | 144 | -18.88 | 484 |
| circAnks1a | rno-miR-1249      | 144 | -22.8  | 801 |
| circAnks1a | rno-miR-1306-5p   | 144 | -28.24 | 135 |
| circAnks1a | rno-let-7a-2-3p   | 143 | -24    | 121 |
| circAnks1a | rno-miR-125b-2-3p | 143 | -26.38 | 849 |
| circAnks1a | rno-miR-204-5p    | 143 | -19.35 | 749 |
| circAnks1a | rno-miR-205       | 143 | -23.94 | 41  |
| circAnks1a | rno-miR-211-5p    | 143 | -18.45 | 749 |
| circAnks1a | rno-miR-222-5p    | 143 | -19.3  | 585 |
| circAnks1a | rno-miR-329-5p    | 142 | -17.85 | 499 |
| circAnks1a | rno-miR-193a-5p   | 142 | -19.45 | 326 |
| circAnks1a | rno-miR-665       | 142 | -18.64 | 173 |
| circAnks1a | rno-miR-6314      | 142 | -21.35 | 874 |
| circAnks1a | rno-miR-30b-3p    | 141 | -26.52 | 510 |
| circAnks1a | rno-miR-135a-3p   | 141 | -17.13 | 628 |
| circAnks1a | rno-miR-503-5p    | 141 | -22.18 | 149 |
| circAnks1a | rno-miR-196c-5p   | 141 | -18.38 | 519 |

|            |                 |     |        |     |
|------------|-----------------|-----|--------|-----|
| circAnks1a | rno-miR-328a-5p | 140 | -23.24 | 880 |
| circAnks1a | rno-miR-34a-5p  | 140 | -18.3  | 406 |
| circAnks1a | rno-miR-300-3p  | 140 | -22.4  | 300 |
| circAnks1a | rno-miR-874-3p  | 140 | -22.49 | 869 |
| circAnks1a | rno-miR-667-5p  | 140 | -21.58 | 672 |
| circAnks1a | rno-miR-711     | 140 | -21.35 | 624 |
| circAnks1a | rno-miR-3593-5p | 140 | -22.34 | 718 |
| circAnks1a | rno-miR-193b-3p | 140 | -17.19 | 682 |

---

## Supplementary Table 5

### Specific primer sequences

| Gene                               | Primer  | Sequence                        |
|------------------------------------|---------|---------------------------------|
| circAnks1a (rat)                   | Forward | 5'-GGAAGAGCGCGTAGATAAGAAGTA-3'  |
|                                    | Reverse | 5'-AGGGCTGTCTCGTTGTCGTT-3'      |
| Anks1a (rat)                       | Forward | 5'-CTCCATCGACACCGTGAAGAA-3'     |
|                                    | Reverse | 5'-GAGGCGATAATGCGTTTGC-3'       |
| Vegfb(rat)                         | Forward | 5'-ATGGGTAATGTGGTCAAACAACCTC-3' |
|                                    | Reverse | 5'-CTCGGGTACTGGATCATGAGG-3'     |
| Vegfb(mouse)                       | Forward | 5'-CATGGATAGACGTTTATGCACG-3'    |
|                                    | Reverse | 5'-ACTAGTTGTTTGACCACATTGC-3'    |
| $\beta$ -actin (rat)               | Forward | 5'-GGAGATTACTGCCCTGGCTCCTA-3'   |
|                                    | Reverse | 5'-GACTCATCGTACTCCTGCTTGCTG-3'  |
| rat_circ: chr10:4140144-4172981    | Forward | 5'-GTGGATGCCTTGAGGAGGAAG-3'     |
|                                    | Reverse | 5'-GAGGATGTCAGTGTGAGCATC-3'     |
| rat_circ: chr3:8747385-8750638     | Forward | 5'-G TTCAGAGAAGGCGTCGTGGT-3'    |
|                                    | Reverse | 5'-GCTGCTTCCATTTTCGCCATTC-3'    |
| rat_circ: chr1:16514097-16530121   | Forward | 5'-CAGAGGTGATACGATCCTGTG-3'     |
|                                    | Reverse | 5'-CGCTTCAACATTTTCAGCCTCCT-3'   |
| rat_circ: chr10:11669353-11670969  | Forward | 5'-GCCAAGTTGCCCATTTGTGCAT-3'    |
|                                    | Reverse | 5'-TGTGCGGGTACAATTCCCACT-3'     |
| rat_circ: chr2:172320327-172320627 | Forward | 5'-TGGGTGAGAGTGGGATTGTG-3'      |
|                                    | Reverse | 5'-AACGGTATCAGCTGCTGTTT-3'      |
| rat_circ: chr9:100507197-100507524 | Forward | 5'-GCATTGGGTGTCAGGGGTTAG-3'     |
|                                    | Reverse | 5'-GGGATGGAATGAGACCTGGTG-3'     |
| rat_circ: chr1:250833012-250919167 | Forward | 5'-GATGCACACTACCATGTCTAT-3'     |
|                                    | Reverse | 5'-TG TAGCTTTCCCTTCCGAGTG-3'    |



|                                     |         |                               |
|-------------------------------------|---------|-------------------------------|
| rat_circ: chr14:81667646-81672500   | Forward | 5'-CTTGTGGAAACCGTTGGAGATG-3'  |
|                                     | Reverse | 5'-TTGGAGCCAAGTAGATGTTTCAG-3' |
| rat_circ: chr6:23270238-23279721    | Forward | 5'-GCCACGCTTCCAAACTGTGAC-3'   |
|                                     | Reverse | 5'-TCATTCACGTTGCAGCCTCTC-3'   |
| rat_circ: chr17:23684383-23701761   | Forward | 5'-CAGGCAGACGGATGAGGAACG-3'   |
|                                     | Reverse | 5'-TGTGTAGGATGCCAGGGAGAG-3'   |
| rat_circ: chr8:93948882-94008016    | Forward | 5'-CACAGCGAGGGAACTTCACTG-3'   |
|                                     | Reverse | 5'-TGGAGGGCAGGGTTAAAGGGT-3'   |
| rat_circ: chr12:19311511-19312478   | Forward | 5'-CGATTGATGATGGAGCAGCGG-3'   |
|                                     | Reverse | 5'-GGTCCCATACTTGAAGTCTTC-3'   |
| rat_circ: chr10:109122252-109148654 | Forward | 5'-GCCCTGGACAAGTGTCAGGCT-3'   |
|                                     | Reverse | 5'-GACACCTGCCAGTGCTTTCTC-3'   |
| rat_circ: chr2:188886906-188931941  | Forward | 5'-CGATTCGTCATGAAGACGCTC-3'   |
|                                     | Reverse | 5'-GCGATGATCAAACCAAGCAGG-3'   |
| rat_circ: chr18:27956412-27984766   | Forward | 5'-CTGCCCTGATGGCCGACTCAT-3'   |
|                                     | Reverse | 5'-TGTTTACCAGGGTTGTCACCTGT-3' |
| rat_circ: chr4:84682374-84706882    | Forward | 5'-ATGGAAGAGATTCTGAGCAGC-3'   |
|                                     | Reverse | 5'-GGCAGGTCTGCTTATCACTAT-3'   |
| rat_circ: chr3:122130941-122141403  | Forward | 5'-GTCTTCATCGGTGTGGGTGTG-3'   |
|                                     | Reverse | 5'-CACTGATTTGTCAGCCTGAGTC-3'  |
| rat_circ: chr2:172312783-172350004  | Forward | 5'-CCACCAGAGGACAAGCTAGAAT-3'  |
|                                     | Reverse | 5'-GAGGTTCATCCCACCTTTGTAGT-3' |
| rat_circ: chr1:79848478-79856028    | Forward | 5'-CAAGCCTGAGGTGGTCAACAT-3'   |
|                                     | Reverse | 5'-TGGACTTAGATAGCTTGATGGTG-3' |
| rat_circ: chr7:11216020-11216322    | Forward | 5'-CAAGCTGTGCGCTGGAAGTTC-3'   |
|                                     | Reverse | 5'-GCAAAGGTGCTATAGGGTGAG-3'   |
| ChIP for <i>Vegfb</i> promoter      | Forward | 5'-GGGTGGACATCATCAGGAGAG-3'   |
|                                     | Reverse | 5'-GACGACTTTGAAGGACTGGCT-3'   |

|                                          |         |                            |
|------------------------------------------|---------|----------------------------|
| ChIRP for <i>Vegfb</i> promoter region 1 | Forward | 5'-CCTTCAAAGTCGTCAGGGAG-3' |
|                                          | Reverse | 5'-GTAAGGACAGCAGGGCTCG-3'  |
| ChIRP for <i>Vegfb</i> promoter region 2 | Forward | 5'-GTCAAGGAAGCAGCAGCA-3'   |
|                                          | Reverse | 5'-CACACCACTCTTGACCCAC-3'  |

---

## Supplementary Table 6

### The target sequences of siRNA

| Gene          | Name  | Sequence                    |
|---------------|-------|-----------------------------|
| circAnks1a    | siRNA | 5'-GAGGACTGAAGAACAACGA-3'   |
| Anks1a        | siRNA | 5'-CTAGATCAGTTATGTTCAACC-3' |
| Vegfb         | siRNA | 5'-GCAGATCATCAGAAACTTA-3'   |
| YBX1          | siRNA | 5'-CCAAGGAAGACGTATTTGT-3'   |
| transportin-1 | siRNA | 5'-GCATAGAGATGCAGCCTTA-3'   |

## Supplementary Table 7

### The nucleotide sequences of probes used in RNA pull-down assays (Table 7a)

| Probe Name              | Sequence                               |
|-------------------------|----------------------------------------|
| circAnks1a probe        | 5'-CTCGTTGTCGTTGTTCTTCAGTCCTCCCGTC-3'  |
| circAnks1a random probe | 5'-ATTCCTCGTCTCTGTGCGGTTCTCCGTTCCCT-3' |
| miR-324-3p probe        | 5'-CCACUGCCCCAGGUGCUGCUGG-3'           |
| miRNA random probe      | 5'-UUGUACUACACAAAAGUACUG-3'            |

### The nucleotide sequences of probes used in ChIRP (Table 7b)

| Probe Name   | Sequence                       |
|--------------|--------------------------------|
| circAnks1a-1 | 5'-GCGGGGTTTCAAATTTGTTG-3'     |
| circAnks1a-2 | 5'-TGCTGCAGCTCAGGAGATTG-3'     |
| circAnks1a-3 | 5'-AGGTCTCGGACAGTGTCAAG-3'     |
| circAnks1a-4 | 5'-GAGGTCTTGTCTACATCTTT-3'     |
| circAnks1a-5 | 5'-GGATGTCAGAATCAAGAGTC-3'     |
| circAnks1a-6 | 5'-TGTGAGCAGCAGCTCATATG-3'     |
| circAnks1a-7 | 5'-GTTGTCGTTGTTCTTCAGTCCTCC-3' |
| mAnks1a-1    | 5'-ATCTACGCAGTTCACATTCG-3'     |
| mAnks1a-2    | 5'-CTTTCGAGTCAGCAACGTTG-3'     |
| mAnks1a-3    | 5'-TGTTGTTGACTCTGGTGTG-3'      |
| mAnks1a-4    | 5'-GTTCTGGCTGGGGACAGTAA-3'     |
| mAnks1a-5    | 5'-TGGAGGAGACCTGAGAAGT-3'      |

## Supplementary Table 8

### The nucleotide sequences of probes used in EMSA (Table 8a)

| Probe Name                  | Sequence                                                    |
|-----------------------------|-------------------------------------------------------------|
| circAnks1a site-1           | 5'-CCUAGGGAACGCCCCGCCACCUCAGCAAAGCCGCCGCCUGAUGAA<br>GAG-3'  |
| circAnks1a site-1<br>mutant | 5'-CCUAGGGAACGCCCCGCCACCAGGUCGUUAGCCGCCGCCUGAUGAA<br>GAG-3' |
| circAnks1a site-2           | 5'-UGGCUGCAGGAAUCGACGUACAACAUAAGGACAACCGUGGCCUGA<br>CU-3'   |
| circAnks1a site-2<br>mutant | 5'-UGGCUGCAGGAAUCGACGUCUUGUAGUAGGACAACCGUGGCCUGA<br>CU-3'   |

### The nucleotide sequences of probes used in Northern blotting (Table 8b)

| Probe Name | Sequence                                       |
|------------|------------------------------------------------|
| circAnks1a | 5'-UGUCGUUGUUCUUCAGUCCU-3'                     |
| mAnks1a    | 5'-UAUAAGGGUCAAGGGGCCGUACUUUUUGAGUUCUUUGAUC-3' |
